1           **Screening effects of HCN channel blockers on sleep/wake behavior in zebrafish**

2

3           **Fusun DOLDUR-BALLI<sup>1,\*</sup>, Brendan KEENAN<sup>1</sup>, Amber ZIMMERMAN<sup>1</sup>, Olivia J.**

4                           **VEATCH<sup>2</sup>, Sandra SMIESZEK<sup>3</sup>, Allan I. PACK<sup>1</sup>,**

5

6           <sup>1</sup>Division of Sleep Medicine, Department of Medicine, Perelman School of Medicine,

7                           University of Pennsylvania, Philadelphia, PA, USA

8           <sup>2</sup>Department of Psychiatry and Behavioral Sciences, School of Medicine, The University of

9                           Kansas Medical Center, Kansas City, KS, USA

10           <sup>3</sup>Vanda Pharmaceuticals, 2200 Pennsylvania NW, Suite 300-E, Washington, DC, USA

11

12                           **\*Correspondence:** [fusun.balli@pennmedicine.upenn.edu](mailto:fusun.balli@pennmedicine.upenn.edu)

13

14

15

16

17

18

19

20

21

22

23

1 **Acknowledgements**

2 This study was funded by Vanda Pharmaceuticals.

3 **Conflict of Interest**

4 None.

5

6 **Animal Studies**

7 Zebrafish experiments were performed in accordance with University of Pennsylvania

8 Institutional Animal Care and Use Committee (IACUC) guidelines (protocol# 806646).

9

10

11

12

13

14

15

16

17

18

19

20

21

22

23

## 1        **Screening effects of HCN channel blockers on sleep/wake behavior in zebrafish**

2        **Abstract:** Hyperpolarization-activated cyclic nucleotide-gated (HCN) ion channels generate  
3        electrical rhythmicity in various tissues although primarily heart, retina and brain. The HCN  
4        channel blocker compound, Ivabradine (Corlanor), is approved by the US Food and Drug  
5        Administration (FDA) as a medication to lower heart rate by blocking hyperpolarization  
6        activated inward current in the sinoatrial node. In addition, a growing body of evidence  
7        suggests a role for HCN channels in regulation of sleep/wake behavior. Zebrafish larvae are  
8        ideal model organisms for high throughput drug screening, drug repurposing and behavioral  
9        phenotyping studies. We leveraged this model system to investigate effects of three HCN  
10       channel blockers (Ivabradine, Zatebradine Hydrochloride and ZD7288) at multiple doses on  
11       sleep/wake behavior in wild type zebrafish. Results of interest included shorter latency to  
12       sleep at 0.1  $\mu\text{M}$  dose of Ivabradine (ANOVA,  $p:0.02$ ), moderate reductions in average  
13       activity at 30  $\mu\text{M}$  dose of Zatebradine Hydrochloride (ANOVA,  $p:0.024$ ), and increased sleep  
14       at 4.5  $\mu\text{M}$  dose of ZD7288 (ANOVA,  $p:0.036$ ). These differences support the hypothesis that  
15       compounds blocking HCN channels can decrease wakefulness.

16       **Key words:** HCN channel blockers, drug screening, sleep/wake, zebrafish, Ivabradine  
17       (Corlanor), Zatebradine hydrochloride, ZD7288.

### 18       **1. Introduction**

19       Hyperpolarization-activated cyclic nucleotide-gated (HCN) ion channels are members of the  
20       family of the voltage gated ion channels (Sartiani et al. 2017). HCN channels are encoded by  
21       the *HCNI-4* gene family (Chang et al. 2019) and can form homotetramers or heterotetramers  
22       with distinct biophysical properties (Sartiani et al. 2017). These integral membrane proteins  
23       (Flynn and Zagotta 2018) generate an inward current in heart ( $I_f$ ) and nerve cells ( $I_h$ ) (Novella

1 Romanelli et al. 2016). HCN channels are known as pacemakers (Wobig et al. 2020); they  
2 modulate cardiac rhythmicity and neuronal excitability (Wobig et al. 2020). Functions of  
3 HCN channels in photoreceptors include adaptation of the vertebrate retina to visual stimuli  
4 (Barrow and Wu 2009). Notably, HCN channels are also involved in regulation of sleep/wake  
5 behavior (Lewis and Chetkovich 2011; Sartiani et al. 2017; Byczkowicz et al. 2019; Chang  
6 et al. 2019) by contributing to the formation of spindle waves (McCormick and Pape 1990;  
7 Bal and McCormick 1996) and slow wave oscillations during non-Rapid Eye Movement  
8 (REM) sleep (Kanyshkova et al. 2009; Zobeiri et al. 2018). There are different reports on  
9 how HCN channels fulfill sleep related functions. One line of research suggests that  
10 inhibition of HCN channels, thereby inhibition of  $I_h$  current, via local infusion of melatonin  
11 in mouse lateral hypothalamus is associated with reductions in wakefulness (Huang, Li, and  
12 Leng 2020). In contrast, inhibition of  $I_h$  current via orexin A application to mouse prelimbic  
13 cortex increased wakefulness (Li et al. 2010). Another study reported sleep fragmentation in  
14 a *Drosophila* mutant model, which lacks  $I_h$  current; however, no significant difference in  
15 total sleep amount was noted between mutant and control flies (Gonzalo-Gomez et al. 2012).  
16 These different findings reported in the literature led us to test effects of HCN channel  
17 blockers on sleep/wake behavior in zebrafish as they are an ideal vertebrate system for  
18 performing high-throughput screening of small molecule compounds. We evaluated  
19 Ivabradine, Zatebradine hydrochloride and ZD7288 in this study. Specifically, Ivabradine  
20 has been observed to inhibit inward current in human embryonic kidney cell lines, Chinese  
21 hamster ovary cell lines and rabbit sinoatrial nodes (Novella Romanelli et al. 2016).  
22 Zatebradine inhibited inward current in human embryonic kidney cell lines and *Xenopus*  
23 oocytes (Novella Romanelli et al. 2016). Administration of ZD7288 was found to inhibit

1 inward current in human embryonic kidney cell lines, Chinese hamster ovary cell lines,  
2 *Xenopus* oocytes, rat dorsal ganglion neurons, spontaneously hypertensive ventricular  
3 myocytes and Guinea pig sinoatrial nodes (Novella Romanelli et al. 2016). These compounds  
4 block HCN subunits nonselectively (Zhong and Darmani 2021; Novella Romanelli et al.  
5 2016). All three compounds are pharmacological tools used to reduce heart rate (Novella  
6 Romanelli et al. 2016); however, Ivabradine is the only FDA approved drug used in patients  
7 with heart failure (Novella Romanelli et al. 2016). In this study, we utilized these compounds  
8 to block HCN channels, thereby inhibiting  $I_h$  current, and studied the effects on sleep in  
9 zebrafish larvae.

10 Drug screening studies using zebrafish models have been instrumental in detecting effects of  
11 small molecule compounds on regulation of sleep/wake behavior and circadian rhythm (Rihel  
12 et al. 2010; Mosser et al. 2019). In addition, zebrafish are useful for identifying biological  
13 targets and biochemical pathways through which drugs exert their functions (Rihel et al.  
14 2010; Mosser et al. 2019; Hoffman et al. 2016). The zebrafish model has several additional  
15 advantages, such as yielding a high number of offspring per breeding and high throughput  
16 assessment of sleep/wake. It is a diurnal and genetically tractable organism. It serves as a  
17 simple vertebrate model that bridges invertebrate and mammalian model organisms  
18 (Oikonomou and Prober 2017). Sleep phases and regulation of sleep in zebrafish are  
19 conserved and meet all the behavioral criteria that are used to define a sleep state (Rihel,  
20 Prober, and Schier 2010; Zhdanova 2006). Given these advantages, to reveal effects of HCN  
21 channel blocker compounds on sleep/wake behavior, we tested if wild type zebrafish larvae  
22 exposed to three compounds, administered at different dosages, expressed differences in  
23 multiple sleep-related traits when compared to vehicle (DMSO) exposed fish.

## 1 **2. Materials and Methods**

### 2 **2.1. Zebrafish Sleep/Wake Assay**

3 Larval zebrafish were raised on a 14 hour/10 hour light/dark cycle at 28.5°C. The entrainment  
4 and activity measurement equipment (ViewPoint Life Sciences Inc., aka Zebraboxes) houses  
5 96 well plates and is continuously illuminated with infrared lights for data acquisition. The  
6 equipment is also illuminated with white light for the 14 hour light cycle, followed by 10  
7 hours dark to provide the complete day and night cycle. A constant temperature of 28.5°C is  
8 ensured by recirculating water in the chamber of the equipment. Zebrafish larvae collected  
9 from a wild type line (AB line) were individually pipetted into each well of a 96 well plate  
10 (Whatman, catalog no: 7701-1651) containing 650 µl of standard embryo medium (E3  
11 embryo medium, 5 mM NaCl, 0.17 mM KCl, 0.33 mM CaCl<sub>2</sub>, 0.33 mM MgSO<sub>4</sub>, pH 7.4) at  
12 4 days post fertilization. Water levels were topped off each morning once lights were on.

### 13 **2.2. Drug Testing**

14 Experiments were performed on 96 well plates. Four wells chosen at random (maximum one  
15 per row) did not include any larvae but were instead filled with standard embryo medium (E3  
16 embryo medium) to serve as quality control (QC) for the settings, recording and sensitivity  
17 of the equipment. Ivabradine (Cayman, Cas Registry No. 148849-67-6), Zatebradine  
18 hydrochloride (Tocris, Cas Registry No. 91940-87-3) and ZD7288 (Tocris, Cas Registry No.  
19 133059-99-1) were tested in this study. Each compound was tested at six concentrations  
20 varying between 0.1-30 µM (i.e., 0.1 µM, 0.3 µM, 1.0 µM, 4.5 µM, 10 µM and 30 µM), as  
21 reported previously (Rihel et al. 2010). Each drug was dissolved in DMSO. Stock solutions  
22 of Ivabradine, Zatebradine hydrochloride and ZD7288 were prepared at 35 millimolar, 40

1 millimolar and 30 millimolar concentrations, respectively. As indicated by the  
2 manufacturers; solubility of Ivabradine and Zatebradine hydrochloride in DMSO is 20 mg/ml  
3 and that of ZD7288 is 100 millimolar. Lower concentrations were obtained by serial dilution.  
4 Each dose was tested on 11-12 larvae per plate, depending on the location of the randomly  
5 chosen QC wells, for evaluating the impact of different doses of the target drug on sleep and  
6 behavioral phenotypes. Zebrafish larvae were allowed to acclimate to the environment by  
7 spending the first night without any exposure to drugs and baseline sleep was observed during  
8 the second night. Drugs were then added at six days post fertilization at 5:00 pm; this was a  
9 one-time drug administration. Thus, each assay was performed over a total of four days:  
10 acclimation on day 1, tracking baseline sleep on day 2, drug administration on day 3 and data  
11 acquisition on days 2-4 (see Figure 1). Concurrently, we studied 11-12 embryos that served  
12 as a DMSO (or drug vehicle, 1:1000 vol:vol) exposed control group and 11-12 embryos were  
13 exposed to 100 nM (0.1 micromolar) of melatonin as a positive control. Prior literature has  
14 utilized this concentration of melatonin to demonstrate sleep-promoting effects (Zhdanova et  
15 al. 2001), and our own proof-of-concept data shows that this concentration of melatonin is  
16 very effective for increasing sleep in zebrafish larvae (see Supplementary Figure S1). The  
17 studies for Ivabradine were repeated six times (three replicates in two Zebraboxes) for a total  
18 of 66-72 fish for each drug concentration (11-12 fish per replicate) to ensure robust statistical  
19 power. Based on statistical power analysis, providing an effect size of 0.8, appropriate sample  
20 size to determine significance was  $n=25$ . Therefore, we concluded that three repeats of  
21 Zatebradine hydrochloride and ZD7288 assays using a different group of wild type embryos  
22 for each replicate would be sufficient by providing three biological replicates for a total of

1 33-36 fish for each drug concentration (11-12 fish per replicate, all replicates were carried  
2 out in the same Zebrabox for each drug).

### 3 **2.3. Behavioral Phenotyping**

4 Locomotor activity was monitored via a commercially available video tracking system in  
5 quantization mode (ViewPoint Life Sciences Inc.) and data were analyzed using a custom  
6 designed MATLAB code (Hoffman et al. 2016; Rihel, Prober, and Schier 2010; Lee et al.  
7 2017). Behavioral tracking took place for three days starting from baseline sleep on day 5 of  
8 larval development (see Figure 1). The evaluated sleep phenotypes (see Table 1) included  
9 total sleep duration, average activity, average waking activity, sleep bout numbers,  
10 consolidation of sleep (average sleep bout length) and latency to sleep as a measure relevant  
11 to insomnia. Sleep was defined as any one-minute period of inactivity with less than 0.5  
12 second of movement as described previously (Rihel, Prober, and Schier 2010). A sleep bout  
13 was defined as a continuous sequence of sleep minutes. Latency to sleep was measured by  
14 detecting the length of time starting from lights on (corresponding to daytime sleep) or off  
15 (corresponding to nighttime sleep) until the start of the first sleep bout. Total seconds spent  
16 swimming per minute was defined as activity. Primary analyses were based on phenotypes  
17 calculated within the time window between 30 minutes after drug administration (drug  
18 administration was performed at 5:00 pm) and 11 pm (beginning of lights off period).  
19 Secondary analyses were performed for the night after drug administration (lights off period).

### 20 **2.4. Statistical Analysis**

21 Analyses were performed to evaluate phenotypic effects of compounds of interest at six  
22 concentrations – 0.1  $\mu\text{M}$ , 0.3  $\mu\text{M}$ , 1.0  $\mu\text{M}$ , 4.5  $\mu\text{M}$ , 10  $\mu\text{M}$  and 30  $\mu\text{M}$  – as reported by Rihel  
23 *et al* (Rihel et al. 2010) using complementary approaches. First, to evaluate the relationship



1 between drug doses and sleep phenotypes with minimal assumptions, we performed an  
2 analysis of variance (ANOVA) testing whether there were any differences in phenotypes  
3 among the experimental groups (DMSO and drug doses). If results for this overall ANOVA  
4 were significant ( $p < 0.05$ ), we examined pairwise differences between drug doses and  
5 camera-matched DMSO controls to assess which groups were driving the overall differences,  
6 including calculation of standardized mean differences (SMDs). The standardized mean  
7 difference (SMD) was calculated by dividing the observed mean difference between groups  
8 by the pooled standard deviation. As defined by Cohen (Cohen 1988), SMDs of 0.2, 0.5 and  
9 0.8 represent small, medium and large differences, respectively. In addition to ANOVA, two  
10 complementary dose-response analyses were performed to evaluate whether a consistent  
11 change in sleep phenotypes was observed for increasing drug doses. First, we performed a  
12 linear trend analysis, including dose as an ordinal variable in the regression model (e.g.,  
13 DMSO = 0, 0.1  $\mu\text{M}$  = 1, 0.3  $\mu\text{M}$  = 2, ..., 30  $\mu\text{M}$  = 6). This model treats differences between  
14 doses as similar in magnitude, asking whether there is a linear increase for higher dosage  
15 groups. Second, dose was included as a continuous variable in linear regression, to estimate  
16 the expected change in outcome for a 1  $\mu\text{M}$  increase in drug dose; these analyses give  
17 increased weight to differences between DMSO and higher dosage groups (e.g. 10  $\mu\text{M}$  or 30  
18  $\mu\text{M}$ ). A p-value  $< 0.05$  was considered evidence of a significant association across all  
19 analyses. To maximize statistical power, analyses were performed pooling data from all  
20 experiments. To help account for potential batch effects, the experimental replicate (1, 2 or  
21 3) was included as a covariate and analyses of Ivabradine also included a covariate for  
22 experimental box (1 or 2), as two different boxes were utilized. In addition, all analyses  
23 performed on data measured after drug administration were adjusted for baseline values of

1 the given phenotype during the same time period prior (i.e., data from the day before and  
2 data from the night before were used as baseline values in primary and secondary analysis,  
3 respectively). Analyses in which significant associations in both ANOVA and dose-response  
4 analyses are observed were considered the most robust evidence for an effect of the drug  
5 compound. Results in which there were observed differences based on ANOVA but not  
6 following dose-response analyses were assumed to suggest a single dose of drug may be  
7 driving the overall results.

## 8 **2.5. Power and Sample Size**

9 Our study included between 33-36 larvae per drug concentration across three biological  
10 replicates. This represents nearly twice the maximum sample size utilized by a previous  
11 zebrafish drug screening study which detected significant effects (Rihel et al. 2010).  
12 Furthermore, for pairwise contrasts,  $\geq 33$  animals per group were estimated to provide  $>80\%$   
13 power to detect standardized effect size differences (i.e., Cohen's  $d$ ) of at least 0.70 at an  
14  $\alpha=0.05$ , which represent moderate-large effects. Analyses leveraging all data to examine the  
15 linear dose response ( $n \approx 240$  total larvae) were well-powered to detect considerably smaller  
16 effects, including  $>90\%$  power for a correlation of 0.21 (equal to 4.4% variance in sleep  
17 behavior explained by drug concentration [ $R^2 = 0.044$ ]).

## 18 **3. Results**

### 19 **3.1. Summary**

20 Visual inspection of plots of sleep/wake phenotypes across Ivabradine, Zatebradine  
21 hydrochloride and ZD7288 doses in some experiments suggested characteristics consistent  
22 with increased sleep on the day of drug administration. However, any differences observed  
23 with these drug compounds were smaller than the effect of melatonin (see Figures 2, 3, and

1 4). Each drug dose was tested on 33-36 zebrafish larvae in three biological replicates. Results  
2 of analyses performed as described in Section 2.4 for each drug are presented in more detail  
3 below.

## 4 **3.2. Statistical Analysis of Ivabradine Screening**

### 5 **3.2.1. Primary Analysis**

6 Primary analyses of phenotypes as calculated within the time window between 30 minutes  
7 after Ivabradine administration (drug administration was performed at 5:00 pm) and 11 pm  
8 (beginning of the lights off period) are presented in Table 2. In ANOVA comparisons among  
9 groups, there was a difference in sleep latency ( $p = 0.020$ ), with a shorter latency in the 0.1  
10  $\mu\text{M}$  group compared to DMSO (SMD = -0.321,  $p = 0.048$ ). No differences in latency were  
11 observed between DMSO and other dosage groups, and results of linear and continuous  
12 dosage models were non-significant (see Table 2). Near significant differences—following  
13 ANOVA—were observed in average activity ( $p = 0.094$ ), and average waking activity ( $p =$   
14  $0.073$ ). For both endpoints, continuous dosage models suggested some decreased activity for  
15 each 1  $\mu\text{M}$  increase in Ivabradine, likely driven by the lower mean value in the 30  $\mu\text{M}$  group.  
16 For comparison to differences between DMSO and Ivabradine doses, results of analyses  
17 comparing DMSO to the positive control melatonin during the same time period are shown  
18 in Supplementary Table S1. Strong differences between DMSO and melatonin were observed  
19 for all phenotypes (all  $p \leq 0.006$ ), with absolute standardized mean differences (SMDs)  
20 ranging from 0.49 for bout length to 1.15 for average waking activity.

### 21 **3.2.2. Secondary Analysis**

22 Secondary analysis was performed for sleep phenotypes during the lights off period after  
23 Ivabradine administration (Supplementary Table S2). No significant differences among

1 Ivabradine doses were observed based on ANOVA. A small increase in total sleep was  
2 observed in the continuous dosage model, with an increase of 0.71 minutes (95% CI: 0.09,  
3 1.34) sleep for each 1  $\mu$ M increase in Ivabradine ( $p = 0.025$ ). Results comparing DMSO and  
4 melatonin are again presented as a positive control (Supplementary Table S3). Small to  
5 moderate differences were observed with Melatonin in the number (SMD = -0.49,  $p = 0.002$ )  
6 and length (SMD = 0.38,  $p = 0.007$ ) of sleep bouts, but there were no differences in total  
7 sleep or sleep latency.

### 8 **3.3. Statistical Analysis of Zatebradine Hydrochloride Screening**

#### 9 **3.3.1. Primary Analysis**

10 Comparisons of sleep and activity patterns among drug doses immediately after Zatebradine  
11 Hydrochloride administration are presented in Table 3. Differences were observed among  
12 groups for average activity ( $p = 0.024$ ) and average waking activity ( $p = 0.030$ ), but there  
13 were no differences in other phenotypes based on ANOVA. Compared to DMSO, the 30  $\mu$ M  
14 dose group showed significantly lower average activity (SMD = -0.43,  $p = 0.032$ ) and average  
15 waking (SMD = -0.40,  $p = 0.041$ ) activity. These differences are reflected in significant  
16 associations in continuous dose models for each phenotype, but only trending results in linear  
17 models (Table 3). An association ( $p = 0.034$ ) in the dosage model was also observed for sleep  
18 latency, with each 1  $\mu$ M increase in Zatebradine Hydrochloride associated with a 1.61 minute  
19 decrease (95% CI: -3.09, -0.13). We again observed significant differences in all phenotypes  
20 when comparing DMSO to melatonin as a positive control (Supplementary Table S4), with  
21 absolute SMDs ranging from 0.53 for sleep bout length to 1.42 for average activity and  
22 average waking activity.

23

### 1 **3.3.2. Secondary Analysis**

2 Secondary analyses were performed for sleep phenotypes in the lights off period after  
3 Zatebradine Hydrochloride administration (Supplementary Table S5). There were no among  
4 group differences based on ANOVA. There was statistically significant ( $p = 0.025$ ) evidence  
5 of a small increase in the number of sleep bouts for a  $1 \mu\text{M}$  increase in dosage. There were  
6 no differences between DMSO and Melatonin in the lights off period for these phenotypes  
7 in this experiment (Supplementary Table S6).

### 8 **3.4. Statistical Analysis of ZD7288 Screening**

#### 9 **3.4.1. Primary Analysis**

10 Comparisons of sleep and activity patterns across doses immediately after ZD7288  
11 administration are presented in Table 4. No differences were observed based on ANOVA  
12 results. In dose response analyses of bout length, both the linear model and dosage model  
13 indicated longer bouts with increased dose of ZD7288 ( $p = 0.021$  and  $p=0.005$ ). The linear  
14 model showed an increased bout length of 0.13 minutes per increase in dosage group ( $p =$   
15  $0.021$ ) and the dosage model showed an increased bout length of 0.03 minutes per  $1 \mu\text{M}$   
16 increase ( $p = 0.005$ ). As in previous experiments, comparisons between DMSO and  
17 melatonin as a positive control demonstrated significant differences across all phenotypes  
18 (Supplementary Table S7), with absolute SMDs ranging from 0.82 for sleep bout length to  
19 1.52 for the number of sleep bouts.

#### 20 **3.4.2. Secondary Analysis**

21 Secondary analyses were performed for sleep phenotypes in the lights off period after  
22 ZD7288 administration (Supplementary Table S8). In ANOVA comparisons, differences  
23 among dosage groups were observed for total sleep ( $p = 0.036$ ), number of sleep bouts ( $p =$

1 0.0003) and sleep bout length ( $p = 0.003$ ); there was a near significant difference in sleep  
2 latency ( $p = 0.064$ ). Interestingly, differences among groups were driven by an increase in  
3 total sleep (SMD = 0.53,  $p = 0.008$ ), decreased number of sleep bouts (SMD = -0.75,  $p =$   
4 0.001), and increased sleep bout length (SMD = 0.54,  $p = 0.003$ ) within the 4.5  $\mu\text{M}$  group  
5 compared to DMSO. In addition, the 10  $\mu\text{M}$  group demonstrated fewer sleep bouts than  
6 DMSO (SMD = -0.49,  $p = 0.023$ ). These associations between sleep phenotypes and  
7 moderate doses of ZD7288 are reflected in significant associations in the linear dose response  
8 analyses (Supplementary Table S8). There were no differences between DMSO and  
9 melatonin for these phenotypes in the lights off period (Supplementary Table S9).

#### 10 **4. Conclusion**

11 We describe the results of experiments evaluating the effects of three drug compounds  
12 (Ivabradine [Cayman, Cas Registry No. 148849-67-6], Zatebradine hydrochloride [Tocris,  
13 Cas Registry No. 91940-87-3] and ZD7288 [Tocris, Cas Registry No. 133059-99-1]) on  
14 sleep/wake behavior of wild type zebrafish larvae in this study. Primary analyses were based  
15 on comparisons of phenotypes during the time window 30 minutes after drug administration  
16 (drug administration was performed at 5:00 pm) until 11pm (lights off) as well as data on the  
17 night following drug administration was used for secondary analyses. Overall, there was  
18 modest evidence of these drugs on sleep and wake phenotypes including shorter latency to  
19 sleep in the period following drug administration with 0.1  $\mu\text{M}$  of Ivabradine, moderate  
20 reductions in average activity in the period following drug administration with 30  $\mu\text{M}$  of  
21 Zatebradine Hydrochloride and increased sleep on the night after drug administration for 4.5  
22  $\mu\text{M}$  of ZD7288 compared to DMSO. For Ivabradine and Zatebradine, dosage model was  
23 significant for decrease in activity for the time period immediately after drug administration.

1 Linear model was significant for decrease in activity for the time period immediately after  
2 ZD7288 administration. Ultimately, while several specific doses of Ivabradine, Zatebradine  
3 hydrochloride or ZD7288 demonstrated some differences compared to DMSO, effects of  
4 these compounds was smaller than the effect of Melatonin, a positive control. Although we  
5 didn't identify effects of these drugs on sleep/wake behavior as robust as effect of melatonin,  
6 there was some evidence that blocking HCN channels has effects on decreasing wakefulness.

## 7 **5. Discussion**

8 Screening of HCN channel blockers on sleep/wake behavior of zebrafish larvae showed  
9 shorter latency to sleep at 0.1  $\mu\text{M}$  dose of Ivabradine, moderate reductions in average activity  
10 at 30  $\mu\text{M}$  dose of Zatebradine Hydrochloride, and increased sleep at 4.5  $\mu\text{M}$  dose of ZD7288  
11 as a result of ANOVA analysis in our study. Among these results, reduction in activity  
12 following Zatebradine Hydrochloride administration was supported by dosage model and  
13 increased sleep following ZD7288 administration was supported by linear model. Waking  
14 activity data is utilized to assess health status of the zebrafish larvae in sleep/wake assays  
15 (Rihel et al. 2010). We didn't see large changes in waking activity following administration  
16 of HCN channel blockers. This indicates that the doses administered were not toxic and  
17 zebrafish larvae were healthy during the assessed period of time. There were different reports  
18 on effects of blockade of HCN channels such as decreased (Huang, Li and Leng 2020) and  
19 increased wakefulness (Li et al., 2010) in mouse models, fragmented sleep (Gonzalo-Gomez  
20 et al., 2012) and no change in total sleep duration (Gonzalo-Gomez et al., 2012) in a  
21 *Drosophila* model. The differences we found were in support of the reports suggesting that  
22 blocking HCN channels decreases wakefulness.

1 Use of zebrafish as a model organism provided us the opportunity to assess effects of  
2 compounds on the whole brain instead of focusing on one brain region at a time (Huang, Li  
3 and Leng 2020; Li et al., 2010). Zebrafish is a diurnal organism like humans. This was  
4 another advantage of using zebrafish over using a mouse model as mice are nocturnal.  
5 *Drosophila* is an invertebrate model (Gonzalo-Gomez et al., 2012). Since zebrafish is a  
6 vertebrate model, it possesses more evolutionarily conserved features with mammals  
7 compared to *Drosophila* such as nervous system and neuropharmacology (Oikonomou and  
8 Prober 2017). Limitations of our model of choice might be due to the method of drug  
9 administration. Drug compounds solved in DMSO were pipetted into individual wells of a  
10 96 well plate in which individual larva swims rather than directly administering it such as  
11 injecting. However this is the standard method of drug screening in zebrafish (Mosser et al.  
12 2019; Rihel et al. 2010).

13 Ivabradine does not cross blood brain barrier (Savelieva and Camm 2008). Zatebradine  
14 hydrochloride passes blood brain barrier (Kruger et al. 2000). Ability of ZD7288 to pass  
15 blood brain barrier is not known (Zhong and Darmani 2021). Blood brain barrier is sealed by  
16 day 5 into development in zebrafish (O'Brown, Megason, and Gu 2019). We administered  
17 HCN channel blockers to zebrafish larvae at 6 dpf. Thus, we mimicked the conditions of how  
18 humans take HCN channel blockers in our study.

19 Our study was the first report of testing effects of HCN channel blockers in zebrafish to our  
20 knowledge. We also displayed and analyzed effects of melatonin in zebrafish larvae.

21 Ivabradine, Zatebradine hydrochloride and ZD7288 do not work selectively on HCN channel  
22 subunits (Novella Romanelli et al. 2016). Each HCN channel subunit might be targeted  
23 genetically in future studies to dissect the role of each gene in sleep/wake behavior.



## 1   **References:**

- 2   Bal, T., and D. A. McCormick. 1996. 'What stops synchronized thalamocortical  
3       oscillations?', *Neuron*, 17: 297-308.
- 4   Barrow, A. J., and S. M. Wu. 2009. 'Low-conductance HCN1 ion channels augment the  
5       frequency response of rod and cone photoreceptors', *J Neurosci*, 29: 5841-53.
- 6   Byczkiewicz, N., A. Eshra, J. Montanaro, A. Trevisiol, J. Hirrlinger, M. H. Kole, R.  
7       Shigemoto, and S. Hallermann. 2019. 'HCN channel-mediated neuromodulation  
8       can control action potential velocity and fidelity in central axons', *Elife*, 8.
- 9   Chang, X., J. Wang, H. Jiang, L. Shi, and J. Xie. 2019. 'Hyperpolarization-Activated  
10       Cyclic Nucleotide-Gated Channels: An Emerging Role in Neurodegenerative  
11       Diseases', *Front Mol Neurosci*, 12: 141.
- 12   Cohen, Jacob. 1988. *Statistical power analysis for the behavioral sciences*. (Lawrence  
13       Erlbaum Associates, Publishers: Hillsdale, NJ).
- 14   Flynn, G. E., and W. N. Zagotta. 2018. 'Insights into the molecular mechanism for  
15       hyperpolarization-dependent activation of HCN channels', *Proc Natl Acad Sci U*  
16       *S A*, 115: E8086-E95.
- 17   Gonzalo-Gomez, A., E. Turiegano, Y. Leon, I. Molina, L. Torroja, and I. Canal. 2012.  
18       'Ih current is necessary to maintain normal dopamine fluctuations and sleep  
19       consolidation in Drosophila', *PLoS One*, 7: e36477.
- 20   Hoffman, E. J., K. J. Turner, J. M. Fernandez, D. Cifuentes, M. Ghosh, S. Ijaz, R. A.  
21       Jain, F. Kubo, B. R. Bill, H. Baier, M. Granato, M. J. Barresi, S. W. Wilson, J.  
22       Rihel, M. W. State, and A. J. Giraldez. 2016. 'Estrogens Suppress a Behavioral  
23       Phenotype in Zebrafish Mutants of the Autism Risk Gene, CNTNAP2', *Neuron*,  
24       89: 725-33.
- 25   Huang, Y., Y. Li, and Z. Leng. 2020. 'Melatonin inhibits GABAergic neurons in the  
26       hypothalamus consistent with a reduction in wakefulness', *Neuroreport*, 31: 92-  
27       98.
- 28   Kanyshkova, T., M. Pawlowski, P. Meuth, C. Dube, R. A. Bender, A. L. Brewster, A.  
29       Baumann, T. Z. Baram, H. C. Pape, and T. Budde. 2009. 'Postnatal expression  
30       pattern of HCN channel isoforms in thalamic neurons: relationship to maturation  
31       of thalamocortical oscillations', *J Neurosci*, 29: 8847-57.
- 32   Kruger, C., V. Landerer, C. Zugck, H. Ehmke, W. Kubler, and M. Haass. 2000. 'The  
33       bradycardic agent zatebradine enhances baroreflex sensitivity and heart rate  
34       variability in rats early after myocardial infarction', *Cardiovasc Res*, 45: 900-12.
- 35   Lee, D. A., A. Andreev, T. V. Truong, A. Chen, A. J. Hill, G. Oikonomou, U. Pham, Y.  
36       K. Hong, S. Tran, L. Glass, V. Sapin, J. Engle, S. E. Fraser, and D. A. Prober.  
37       2017. 'Genetic and neuronal regulation of sleep by neuropeptide VF', *Elife*, 6: 1-  
38       35.
- 39   Lewis, A. S., and D. M. Chetkovich. 2011. 'HCN channels in behavior and neurological  
40       disease: too hyper or not active enough?', *Mol Cell Neurosci*, 46: 357-67.
- 41   Li, B., F. Chen, J. Ye, X. Chen, J. Yan, Y. Li, Y. Xiong, Z. Zhou, J. Xia, and Z. Hu.  
42       2010. 'The modulation of orexin A on HCN currents of pyramidal neurons in  
43       mouse prefrontal cortex', *Cereb Cortex*, 20: 1756-67.
- 44   McCormick, D. A., and H. C. Pape. 1990. 'Properties of a hyperpolarization-activated  
45       cation current and its role in rhythmic oscillation in thalamic relay neurones', *J*  
46       *Physiol*, 431: 291-318.

- 1 Mosser, E. A., C. N. Chiu, T. K. Tamai, T. Hirota, S. Li, M. Hui, A. Wang, C. Singh, A.  
2 Giovanni, S. A. Kay, and D. A. Prober. 2019. 'Identification of pathways that  
3 regulate circadian rhythms using a larval zebrafish small molecule screen', *Sci*  
4 *Rep*, 9: 12405.
- 5 Novella Romanelli, M., L. Sartiani, A. Masi, G. Mannaioni, D. Manetti, A. Mugelli, and  
6 E. Cerbai. 2016. 'HCN Channels Modulators: The Need for Selectivity', *Curr*  
7 *Top Med Chem*, 16: 1764-91.
- 8 O'Brown, N. M., S. G. Megason, and C. Gu. 2019. 'Suppression of transcytosis  
9 regulates zebrafish blood-brain barrier function', *Elife*, 8.
- 10 Oikonomou, G., and D. A. Prober. 2017. 'Attacking sleep from a new angle:  
11 contributions from zebrafish', *Curr Opin Neurobiol*, 44: 80-88.
- 12 Rihel, J., D. A. Prober, A. Arvanites, K. Lam, S. Zimmerman, S. Jang, S. J. Haggarty,  
13 D. Kokel, L. L. Rubin, R. T. Peterson, and A. F. Schier. 2010. 'Zebrafish  
14 behavioral profiling links drugs to biological targets and rest/wake regulation',  
15 *Science*, 327: 348-51.
- 16 Rihel, J., D. A. Prober, and A. F. Schier. 2010. 'Monitoring sleep and arousal in  
17 zebrafish', *Methods Cell Biol*, 100: 281-94.
- 18 Sartiani, L., G. Mannaioni, A. Masi, M. Novella Romanelli, and E. Cerbai. 2017. 'The  
19 Hyperpolarization-Activated Cyclic Nucleotide-Gated Channels: from  
20 Biophysics to Pharmacology of a Unique Family of Ion Channels', *Pharmacol*  
21 *Rev*, 69: 354-95.
- 22 Savelieva, I., and A. J. Camm. 2008. 'If inhibition with ivabradine :  
23 electrophysiological effects and safety', *Drug Saf*, 31: 95-107.
- 24 Wobig, L., T. Wolfenstetter, S. Fechner, W. Bonigk, H. G. Korschen, J. F. Jikeli, C.  
25 Trotschel, R. Feederle, U. B. Kaupp, R. Seifert, and T. K. Berger. 2020. 'A  
26 family of hyperpolarization-activated channels selective for protons', *Proc Natl*  
27 *Acad Sci U S A*, 117: 13783-91.
- 28 Zhdanova, I. V. 2006. 'Sleep in zebrafish', *Zebrafish*, 3: 215-26.
- 29 Zhdanova, I. V., S. Y. Wang, O. U. Leclair, and N. P. Danilova. 2001. 'Melatonin  
30 promotes sleep-like state in zebrafish', *Brain Res*, 903: 263-8.
- 31 Zhong, W., and N. A. Darmani. 2021. 'The HCN Channel Blocker ZD7288 Induces  
32 Emesis in the Least Shrew (*Cryptotis parva*)', *Front Pharmacol*, 12: 647021.
- 33 Zobeiri, M., R. Chaudhary, M. Datunashvili, R. J. Heuermann, A. Luttjohann, V.  
34 Narayanan, S. Balfanz, P. Meuth, D. M. Chetkovich, H. C. Pape, A. Baumann,  
35 G. van Luijelaar, and T. Budde. 2018. 'Modulation of thalamocortical  
36 oscillations by TRIP8b, an auxiliary subunit for HCN channels', *Brain Struct*  
37 *Funct*, 223: 1537-64.

38

39

40

41

42

43

1 **Table 1.** Definitions of Key Behavioral Phenotypes in Drug Screening Study

| <b>Phenotypes</b>              | <b>Definition</b>                                                                                                                               |
|--------------------------------|-------------------------------------------------------------------------------------------------------------------------------------------------|
| <b>Total Sleep</b>             | Total sleep in minutes. Sleep is defined as any one-minute period of inactivity with less than 0.5 second of total movement of zebrafish larva. |
| <b>Sleep Bouts</b>             | A continuous sequence of sleep minutes. Total sleep bouts is the bout numbers in a given period.                                                |
| <b>Sleep Latency</b>           | Length of time (in minutes) from lights on or off until the start of the first sleep bout.                                                      |
| <b>Bout Length</b>             | Average duration of a sleep bout (in minutes).                                                                                                  |
| <b>Average Activity</b>        | Average activity (seconds/minute) calculated by dividing total activity by total recording minutes                                              |
| <b>Average Waking Activity</b> | Average waking activity (seconds/minute) calculated by dividing total activity by the total waking minutes                                      |

2

3

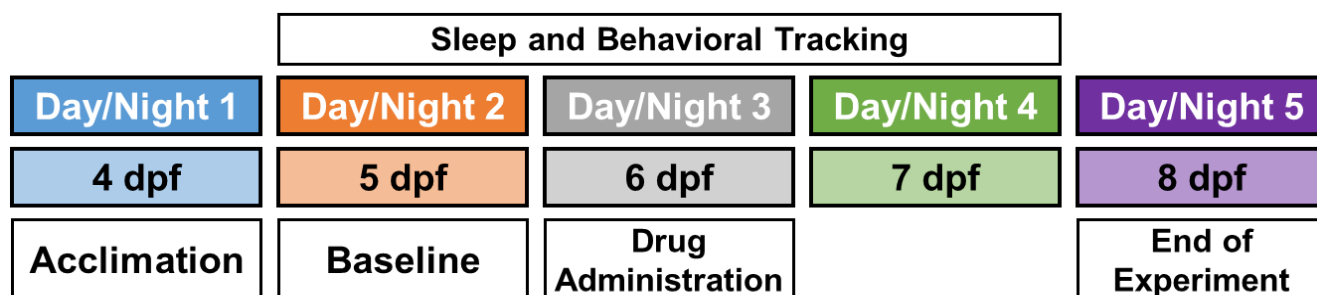

**Figure 1.** Schematic overview of experimental paradigm, including acclimation on experimental day 1 (4 days post fertilization [dpf]), baseline recording on day 2 (5 dpf), drug administration on day 3 (6 dpf) and sleep and behavioral tracking on days 2-4 (5-7 dpf).

4

5

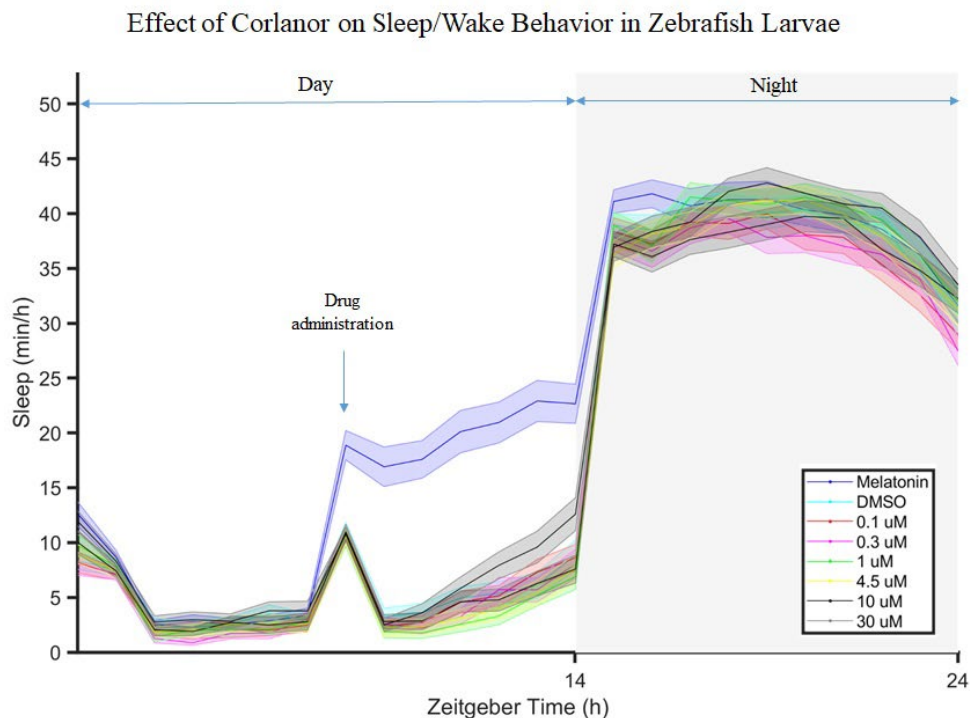

1

2 **Figure 2.** Effect of Ivabradine (Corlanor) on sleep of zebrafish larvae. Different final  
3 concentrations of this drug compound ranging between 0.1  $\mu\text{M}$  and 30  $\mu\text{M}$ , DMSO  
4 control and 0.1  $\mu\text{M}$  melatonin were added to wells containing 6 days post fertilization  
5 larvae. Trending but non-significant increase in sleep duration, likely driven by the higher  
6 mean value in the 30  $\mu\text{M}$  Ivabradine group can be observed. Melatonin increased sleep  
7 immediately after drug administration. 96 well plate was removed from the video  
8 monitoring equipment to administer drug compound and software continued to capture  
9 activity data. The peak in the sleep graph at the time of drug administration was formed  
10 when 96 well plate was removed from the equipment.

11

12

1

**Table 2.** Sleep and Activity Immediately after Drug Administration across Ivabradine Doses

| Phenotype                      | Adjusted Mean (95% CI) <sup>†</sup> |                                      |                         |                         |                        |                        |                        | ANOVA<br>p <sup>‡</sup> | Linear Model <sup>§</sup> |       | Dosage Model <sup>¶</sup>                |              |
|--------------------------------|-------------------------------------|--------------------------------------|-------------------------|-------------------------|------------------------|------------------------|------------------------|-------------------------|---------------------------|-------|------------------------------------------|--------------|
|                                | DMSO                                | 0.1 $\mu$ M                          | 0.3 $\mu$ M             | 1.0 $\mu$ M             | 4.5 $\mu$ M            | 10 $\mu$ M             | 30 $\mu$ M             |                         | $\beta$ (95% CI)          | p     | $\beta$ (95% CI)                         | p            |
| <b>Total Sleep, minutes</b>    | 30.2<br>(21.8, 38.6)                | 33.7<br>(25.3, 42.1)                 | 29.6<br>(21.3, 37.8)    | 22.2<br>(13.7, 30.8)    | 26.0<br>(17.6, 34.4)   | 30.2<br>(21.9, 38.6)   | 34.3<br>(26.0, 42.6)   | 0.447                   | 0.08<br>(-1.50, 1.66)     | 0.924 | 0.18<br>(-0.13, 0.49)                    | 0.253        |
| <b>Sleep Bouts, number</b>     | 13.1<br>(10.2, 16.1)                | 14.2<br>(11.2, 17.1)                 | 12.8<br>(9.9, 15.7)     | 11.6<br>(8.6, 14.6)     | 10.3<br>(7.3, 13.2)    | 13.3<br>(10.4, 16.2)   | 15.8<br>(12.9, 18.7)   | 0.217                   | 0.13<br>(-0.43, 0.69)     | 0.649 | 0.10<br>(-0.01, 0.21)                    | 0.073        |
| <b>Sleep Latency, minutes</b>  | 127.8<br>(101.2, 154.4)             | <b>89.9</b><br><b>(63.6, 116.3)*</b> | 150.8<br>(124.8, 176.9) | 148.6<br>(121.6, 175.6) | 114.8<br>(88.4, 141.2) | 123.6<br>(97.2, 149.9) | 111.4<br>(85.3, 137.5) | <b>0.020</b>            | -0.67<br>(-5.70, 4.36)    | 0.793 | -0.53<br>(-1.52, 0.458)                  | 0.293        |
| <b>Bout Length, minutes</b>    | 2.03<br>(1.74, 2.31)                | 2.03<br>(1.76, 2.30)                 | 2.20<br>(1.91, 2.49)    | 1.83<br>(1.52, 2.14)    | 1.99<br>(1.71, 2.27)   | 1.93<br>(1.64, 2.21)   | 2.02<br>(1.75, 2.30)   | 0.775                   | -0.015<br>(-0.068, 0.038) | 0.578 | -0.001<br>(-0.011, 0.010)                | 0.901        |
| <b>Avg. Activity, sec/min</b>  | 3.26<br>(3.05, 3.47)                | 3.27<br>(3.06, 3.48)                 | 3.40<br>(3.19, 3.60)    | 3.33<br>(3.12, 3.54)    | 3.37<br>(3.16, 3.58)   | 3.22<br>(3.01, 3.43)   | 2.96<br>(2.75, 3.17)   | 0.094                   | -0.036<br>(-0.077, 0.006) | 0.094 | <b>-0.012</b><br><b>(-0.020, -0.004)</b> | <b>0.003</b> |
| <b>Avg. Wake Act., sec/min</b> | 3.32<br>(3.12, 3.53)                | 3.37<br>(3.16, 3.58)                 | 3.48<br>(3.28, 3.68)    | 3.38<br>(3.17, 3.59)    | 3.45<br>(3.25, 3.65)   | 3.29<br>(3.08, 3.49)   | 3.04<br>(2.83, 3.24)   | 0.073                   | -0.037<br>(-0.077, 0.004) | 0.075 | <b>-0.012</b><br><b>(-0.020, -0.004)</b> | <b>0.002</b> |

Statistically significant associations (p<0.05) shown in **bold**; <sup>†</sup>Model estimated mean and 95% confidence interval, adjusted for replicate, experimental box, and baseline values of phenotype; <sup>‡</sup>p-value from ANOVA testing whether there are any differences in phenotype among dosage groups; <sup>§</sup>Results from linear model treating dose as an ordinal variable –  $\beta$  represents the expected change in phenotype associated with increasing to the next highest dosage group; <sup>¶</sup>Results from continuous dosage model –  $\beta$  represents the expected change in phenotype for 1  $\mu$ M increase in dose; \*p<0.05 compared to DMSO in pairwise comparisons (performed only when ANOVA p<0.05).

2

### Effect of Zatebradine Hydrochloride on Sleep/Wake Behavior in Zebrafish Larvae

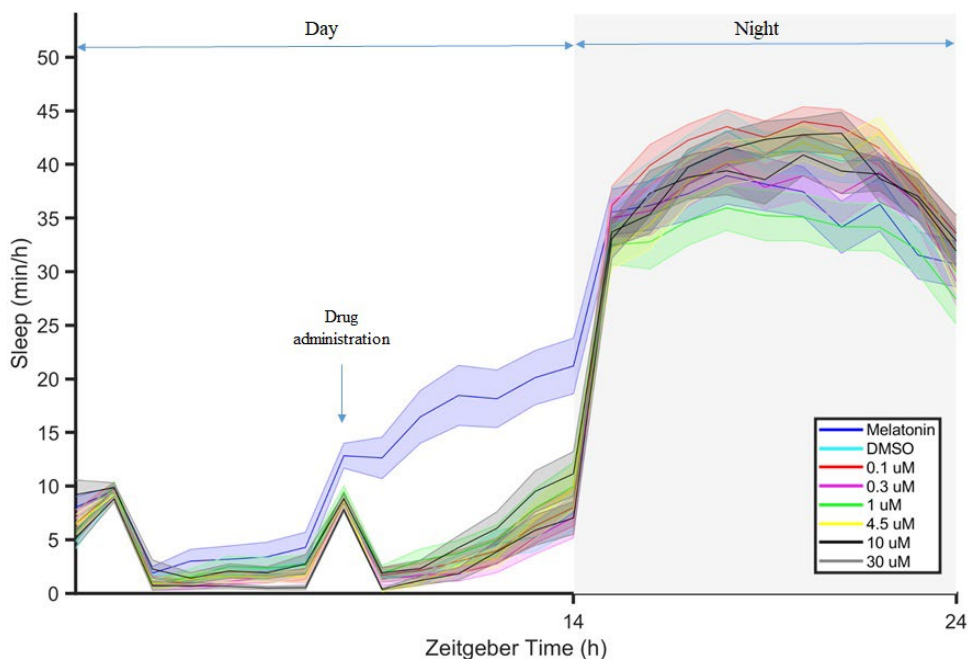

1

2 **Figure 3.** Effect of Zatebradine hydrochloride on sleep of zebrafish larvae. Different final  
3 concentrations of this drug compound ranging between 0.1  $\mu\text{M}$  and 30  $\mu\text{M}$ , DMSO  
4 control and 0.1  $\mu\text{M}$  melatonin were added to wells containing 6 days post fertilization  
5 larvae. The 30  $\mu\text{M}$  dose group showed significantly lower activity compared to DMSO.  
6 Melatonin increased sleep immediately after drug administration. 96 well plate was  
7 removed from the video monitoring equipment to administer drug compound and  
8 software continued to capture activity data. The peak in the sleep graph at the time of  
9 drug administration was formed when 96 well plate was removed from the equipment.

10

11

12

13

14

15

16

17

18

19

1 **Table 3.** Sleep and Activity Immediately after Drug Administration across Zatebradine Hydrochloride Doses

| Phenotype                      | Adjusted Mean (95% CI) <sup>†</sup> |                        |                         |                         |                         |                         |                                     | ANOVA<br>p <sup>‡</sup> | Linear Model <sup>§</sup> |       | Dosage Model <sup>¶</sup>                |              |
|--------------------------------|-------------------------------------|------------------------|-------------------------|-------------------------|-------------------------|-------------------------|-------------------------------------|-------------------------|---------------------------|-------|------------------------------------------|--------------|
|                                | DMSO                                | 0.1 μM                 | 0.3 μM                  | 1.0 μM                  | 4.5 μM                  | 10 μM                   | 30 μM                               |                         | β (95% CI)                | p     | β (95% CI)                               | p            |
| <b>Total Sleep, minutes</b>    | 22.8<br>(11.8, 33.8)                | 25.2<br>(14.2, 36.2)   | 20.5<br>(9.5, 31.4)     | 29.1<br>(18.2, 40.0)    | 25.0<br>(14.2, 35.8)    | 22.3<br>(11.3, 33.3)    | 33.3<br>(22.3, 44.3)                | 0.714                   | 1.08<br>(-0.99, 3.14)     | 0.305 | 0.28<br>(-0.126, 0.686)                  | 0.176        |
| <b>Sleep Bouts, number</b>     | 11.0<br>(6.6, 15.5)                 | 13.2<br>(8.7, 17.7)    | 10.5<br>(6.0, 15.0)     | 14.4<br>(10.0, 18.8)    | 12.7<br>(8.3, 17.1)     | 13.1<br>(8.6, 17.5)     | 15.4<br>(10.8, 19.9)                | 0.757                   | 0.53<br>(-0.32, 1.37)     | 0.220 | 0.10<br>(-0.064, 0.273)                  | 0.225        |
| <b>Sleep Latency, minutes</b>  | 147.0<br>(107.1, 186.8)             | 137.5<br>(97.7, 177.4) | 169.7<br>(129.9, 209.6) | 164.2<br>(125.0, 203.4) | 180.1<br>(140.9, 219.4) | 159.1<br>(119.2, 198.9) | 106.4<br>(66.5, 146.2)              | 0.183                   | -2.41<br>(-9.99, 5.16)    | 0.531 | <b>-1.61</b><br><b>(-3.087, -0.126)</b>  | <b>0.034</b> |
| <b>Bout Length, minutes</b>    | 1.85<br>(1.45, 2.26)                | 2.07<br>(1.68, 2.46)   | 1.97<br>(1.57, 2.38)    | 1.86<br>(1.43, 2.29)    | 1.75<br>(1.37, 2.12)    | 2.14<br>(1.73, 2.54)    | 1.62<br>(1.22, 2.02)                | 0.560                   | -0.030<br>(-0.106, 0.046) | 0.434 | -0.009<br>(-0.024, 0.006)                | 0.228        |
| <b>Avg. Activity, sec/min</b>  | 3.15<br>(2.81, 3.48)                | 3.22<br>(2.89, 3.56)   | 3.44<br>(3.11, 3.78)    | 3.40<br>(3.07, 3.73)    | 3.31<br>(2.98, 3.64)    | 3.21<br>(2.87, 3.54)    | <b>2.62</b><br><b>(2.28, 2.96)*</b> | <b>0.024</b>            | -0.059<br>(-0.123, 0.005) | 0.072 | <b>-0.022</b><br><b>(-0.035, -0.010)</b> | <b>0.001</b> |
| <b>Avg. Wake Act., sec/min</b> | 3.20<br>(2.87, 3.52)                | 3.28<br>(2.95, 3.61)   | 3.49<br>(3.16, 3.82)    | 3.46<br>(3.14, 3.79)    | 3.36<br>(3.04, 3.69)    | 3.24<br>(2.91, 3.57)    | <b>2.71</b><br><b>(2.37, 3.04)*</b> | <b>0.030</b>            | -0.057<br>(-0.119, 0.006) | 0.078 | <b>-0.021</b><br><b>(-0.034, -0.009)</b> | <b>0.001</b> |

Statistically significant associations (p<0.05) shown in **bold**; <sup>†</sup>Model estimated mean and 95% confidence interval, adjusted for replicate and baseline values of phenotype; <sup>‡</sup>p-value from ANOVA testing whether there are any differences in phenotype among dosage groups; <sup>§</sup>Results from linear model treating dose as an ordinal variable – β represents the expected change in phenotype associated with increasing to the next highest dosage group; <sup>¶</sup>Results from continuous dosage model – β represents the expected change in phenotype for 1 μM increase in dose; \*p<0.05 compared to DMSO in pairwise comparisons (performed only when ANOVA p<0.05).

2

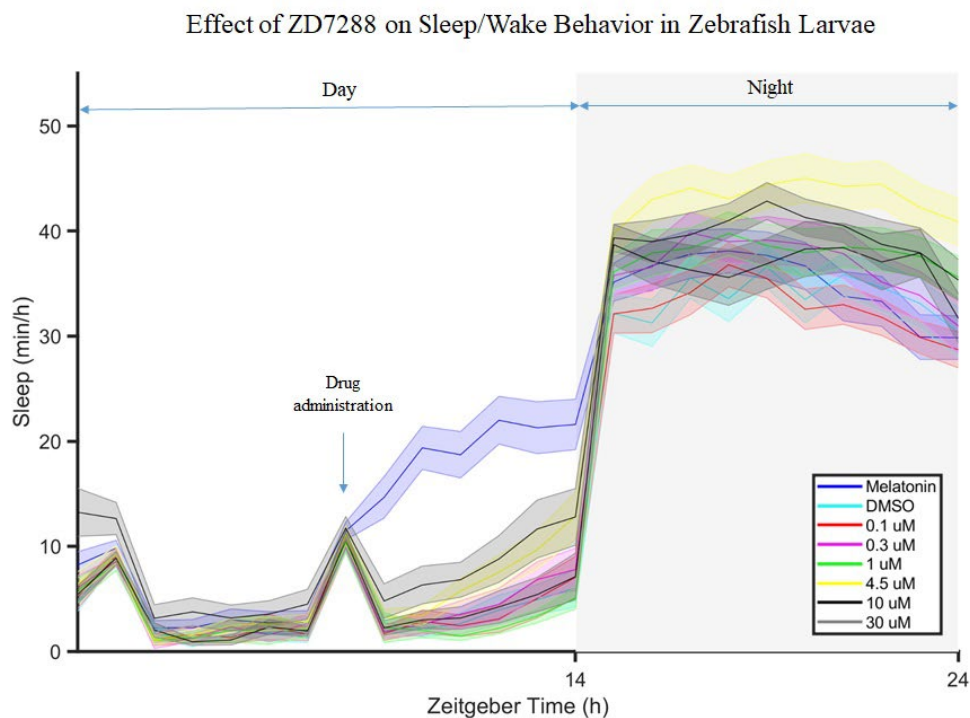

1

2 **Figure 4.** Effect of ZD7288 on sleep of zebrafish larvae. Different final concentrations  
3 of this drug compound ranging between 0.1  $\mu\text{M}$  and 30  $\mu\text{M}$ , DMSO control and 0.1  $\mu\text{M}$   
4 melatonin were added to wells containing 6 days post fertilization larvae. There is some  
5 visual evidence that ZD7288 increased sleep at 4.5 and 30  $\mu\text{M}$  doses after drug was  
6 administered but overall ANOVA was not significant. Total sleep was significantly  
7 increased at 4.5  $\mu\text{M}$  dose compared to DMSO during lights off period. Melatonin  
8 increased sleep immediately after drug administration. 96 well plate was removed from  
9 the video monitoring equipment to administer drug compound and software continued to  
10 capture activity data. The peak in the sleep graph at the time of drug administration was  
11 formed when 96 well plate was removed from the equipment.

12

13

14

15

16

17

18

19

20



1 **Table 4.** Sleep and Activity Immediately after Drug Administration across ZD7288 Doses

| Phenotype                      | Adjusted Mean (95% CI) <sup>†</sup> |                        |                        |                        |                       |                        |                       | ANOVA<br>p <sup>‡</sup> | Linear Model <sup>§</sup>                |               | Dosage Model <sup>¶</sup>             |              |
|--------------------------------|-------------------------------------|------------------------|------------------------|------------------------|-----------------------|------------------------|-----------------------|-------------------------|------------------------------------------|---------------|---------------------------------------|--------------|
|                                | DMSO                                | 0.1 μM                 | 0.3 μM                 | 1.0 μM                 | 4.5 μM                | 10 μM                  | 30 μM                 |                         | β (95% CI)                               | p             | β (95% CI)                            | p            |
| <b>Total Sleep, minutes</b>    | 25.3<br>(12.7, 38.0)                | 25.1<br>(12.2, 38.0)   | 28.4<br>(15.7, 41.0)   | 17.7<br>(4.8, 30.5)    | 43.9<br>(31.1, 56.8)  | 24.5<br>(11.7, 37.3)   | 33.9<br>(20.4, 47.3)  | 0.135                   | 1.41<br>(-1.09, 3.90)                    | 0.268         | 0.26<br>(-0.25, 0.76)                 | 0.320        |
| <b>Sleep Bouts, number</b>     | 12.0<br>(7.6, 16.5)                 | 10.3<br>(5.8, 14.8)    | 13.1<br>(8.7, 17.5)    | 11.4<br>(6.90, 15.95)  | 20.0<br>(15.5, 24.5)  | 11.3<br>(6.8, 15.7)    | 11.2<br>(6.4, 16.0)   | 0.052                   | 0.24<br>(-0.65, 1.14)                    | 0.592         | -0.05<br>(-0.24, 0.13)                | 0.585        |
| <b>Sleep Latency, minutes</b>  | 95.1<br>(60.8, 129.4)               | 132.5<br>(97.7, 167.3) | 106.9<br>(72.6, 141.2) | 133.3<br>(98.3, 168.2) | 94.1<br>(59.0, 129.3) | 125.1<br>(90.0, 160.1) | 84.8<br>(49.8, 119.9) | 0.286                   | -1.91<br>(-8.50, 4.68)                   | 0.569         | -0.89<br>(-2.19, 0.42)                | 0.181        |
| <b>Bout Length, minutes</b>    | 1.60<br>(1.01, 2.18)                | 2.09<br>(1.46, 2.72)   | 1.70<br>(1.12, 2.29)   | 1.67<br>(1.03, 2.30)   | 2.02<br>(1.47, 2.58)  | 1.93<br>(1.28, 2.58)   | 2.64<br>(2.12, 3.16)  | 0.132                   | <b>0.128</b><br><b>(0.020, 0.236)</b>    | <b>0.021</b>  | <b>0.029</b><br><b>(0.009, 0.049)</b> | <b>0.005</b> |
| <b>Avg. Activity, sec/min</b>  | 3.51<br>(3.18, 3.85)                | 3.63<br>(3.29, 3.96)   | 3.23<br>(2.91, 3.56)   | 3.20<br>(2.88, 3.53)   | 3.02<br>(2.69, 3.35)  | 3.36<br>(3.04, 3.69)   | 3.02<br>(2.68, 3.37)  | 0.138                   | <b>-0.074</b><br><b>(-0.144, -0.004)</b> | <b>-0.039</b> | -0.009<br>(-0.023, 0.004)             | 0.170        |
| <b>Avg. Wake Act., sec/min</b> | 3.58<br>(3.27, 3.90)                | 3.70<br>(3.38, 4.03)   | 3.31<br>(3.00, 3.62)   | 3.25<br>(2.94, 3.56)   | 3.14<br>(2.82, 3.46)  | 3.40<br>(3.09, 3.72)   | 3.13<br>(2.80, 3.46)  | 0.167                   | <b>-0.071</b><br><b>(-0.138, -0.003)</b> | <b>-0.040</b> | -0.008<br>(-0.021, 0.005)             | 0.214        |

Statistically significant associations (p<0.05) shown in **bold**; <sup>†</sup>Model estimated mean and 95% confidence interval, adjusted for replicate and baseline values of phenotype; <sup>‡</sup>p-value from ANOVA testing whether there are any differences in phenotype among dosage groups; <sup>§</sup>Results from linear model treating dose as an ordinal variable – β represents the expected change in phenotype associated with increasing to the next highest dosage group; <sup>¶</sup>Results from continuous dosage model – β represents the expected change in phenotype for 1 μM increase in dose; \*p<0.05 compared to DMSO in pairwise comparisons (performed only when ANOVA p<0.05).

2

## Supplementary Figures and Tables

### Effect of Melatonin on Sleep/Wake Behavior in Zebrafish Larvae

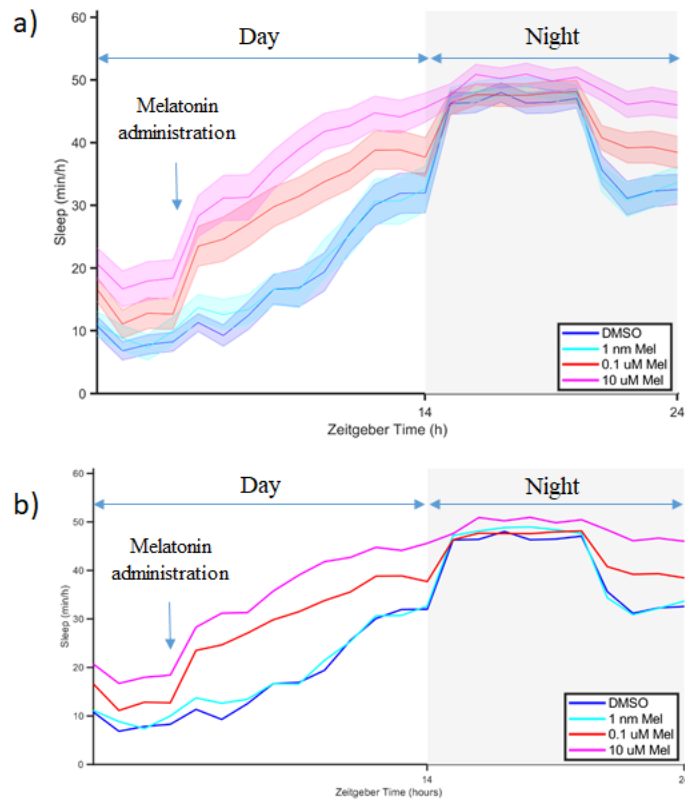

**Figure S1.** Effect of melatonin on sleep of zebrafish larvae. Three different final concentrations of melatonin (1 nanomolar, 100 nanomolar (0.1 micromolar) and 10 micromolar) and DMSO control were added to the wells containing 6 days post fertilization larvae. a) Sleep graph of 1 hour bins with error bars. b) Sleep graph of 1 hour bins without error bars. There is a robust increase in sleep immediately after melatonin administration at concentrations over 1 nanomolar. n:45 per group. There is no difference in the lights off period with melatonin. This seems to be related to a ceiling effect given the high amounts of sleep in control conditions without melatonin. n: number of animals.

**Table S1.** Sleep and Activity Immediately After Ivabradine Administration For Melatonin as a Positive Control\*

| Phenotype                                                                                                                                                                                                                                                                                                                                                                                                                                              | Adjusted Mean (95% CI) <sup>†</sup> |                      | Difference (95% CI) <sup>‡</sup> | p <sup>§</sup>    |
|--------------------------------------------------------------------------------------------------------------------------------------------------------------------------------------------------------------------------------------------------------------------------------------------------------------------------------------------------------------------------------------------------------------------------------------------------------|-------------------------------------|----------------------|----------------------------------|-------------------|
|                                                                                                                                                                                                                                                                                                                                                                                                                                                        | DMSO                                | Melatonin            |                                  |                   |
| <b>Total Sleep, minutes</b>                                                                                                                                                                                                                                                                                                                                                                                                                            | 35.6 (22.1, 49.1)                   | 116.5 (102.9, 130.1) | <b>80.9 (61.7, 100.1)</b>        | <b>&lt;0.0001</b> |
| <b>Sleep Bouts, number</b>                                                                                                                                                                                                                                                                                                                                                                                                                             | 14.7 (10.4, 19.0)                   | 41.4 (37.1, 45.8)    | <b>26.7 (20.5, 32.8)</b>         | <b>&lt;0.0001</b> |
| <b>Sleep Latency, minutes</b>                                                                                                                                                                                                                                                                                                                                                                                                                          | 121.0 (99.5, 142.5)                 | 21.7 (0.0, 43.4)     | <b>-99.3 (-129.9, -68.7)</b>     | <b>&lt;0.0001</b> |
| <b>Bout Length, minutes</b>                                                                                                                                                                                                                                                                                                                                                                                                                            | 2.04 (1.69, 2.39)                   | 2.73 (2.40, 3.06)    | <b>0.69 (0.21, 1.17)</b>         | <b>0.006</b>      |
| <b>Avg. Activity, sec/min</b>                                                                                                                                                                                                                                                                                                                                                                                                                          | 3.22 (3.01, 3.42)                   | 1.28 (1.07, 1.48)    | <b>-1.94 (-2.24, -1.64)</b>      | <b>&lt;0.0001</b> |
| <b>Avg. Wake Act., sec/min</b>                                                                                                                                                                                                                                                                                                                                                                                                                         | 3.30 (3.10, 3.51)                   | 1.35 (1.14, 1.56)    | <b>-1.95 (-2.25, -1.65)</b>      | <b>&lt;0.0001</b> |
| Statistically significant differences (p<0.05) shown in <b>bold</b> ; <sup>†</sup> Model estimated mean and 95% confidence interval, adjusted for replicate, experimental box, and baseline values of phenotype; <sup>‡</sup> Adjusted mean difference and 95% CI between melatonin and DMSO groups; <sup>§</sup> p-value comparing phenotype between DMSO and Melatonin groups. *These data are from experiments that involved studies of Ivabradine. |                                     |                      |                                  |                   |

**Table S2.** Sleep during the lights off period after Drug Administration of different doses of Ivabradine and with DMSO as a control

| Phenotype                     | Adjusted Mean (95% CI) <sup>†</sup> |                         |                         |                         |                         |                         |                         | ANOVA p <sup>‡</sup> | Linear Model <sup>§</sup> |           | Dosage Model <sup>¶</sup>          |                         |
|-------------------------------|-------------------------------------|-------------------------|-------------------------|-------------------------|-------------------------|-------------------------|-------------------------|----------------------|---------------------------|-----------|------------------------------------|-------------------------|
|                               | DMSO                                | 0.1 $\mu$ M             | 0.3 $\mu$ M             | 1.0 $\mu$ M             | 4.5 $\mu$ M             | 10 $\mu$ M              | 30 $\mu$ M              |                      | $\beta$ (95% CI)          | p         | $\beta$ (95% CI)                   | p                       |
| <b>Total Sleep, minutes</b>   | 377.5<br>(360.4, 394.6)             | 375.2<br>(358.2, 392.2) | 366.6<br>(349.9, 383.3) | 384.4<br>(367.1, 401.8) | 377.5<br>(360.6, 394.5) | 366.5<br>(349.5, 383.5) | 398.9<br>(382.1, 415.6) | 0.118                | 2.12<br>(-1.08, 5.33)     | 0.19<br>4 | <b>0.71</b><br><b>(0.09, 1.34)</b> | <b>0.02</b><br><b>5</b> |
| <b>Sleep Bouts, number</b>    | 80.6<br>(76.9, 84.3)                | 74.5<br>(70.8, 78.2)    | 74.4<br>(70.7, 78.0)    | 78.4<br>(74.6, 82.1)    | 78.2<br>(74.6, 81.9)    | 78.8<br>(75.1, 82.5)    | 80.7<br>(77.1, 84.4)    | 0.071                | 0.47<br>(-0.23, 1.17)     | 0.18<br>5 | 0.13<br>(-0.007, 0.267)            | 0.06<br>3               |
| <b>Sleep Latency, minutes</b> | 6.86<br>(6.05, 7.68)                | 5.77<br>(4.95, 6.58)    | 6.26<br>(5.46, 7.07)    | 5.67<br>(4.84, 6.50)    | 6.84<br>(6.02, 7.65)    | 6.90<br>(6.09, 7.72)    | 6.41<br>(5.61, 7.22)    | 0.160                | 0.054<br>(-0.100, 0.208)  | 0.48<br>9 | 0.010<br>(-0.021, 0.040)           | 0.53<br>2               |
| <b>Bout Length, minutes</b>   | 5.02<br>(4.56, 5.48)                | 5.29<br>(4.84, 5.75)    | 5.32<br>(4.87, 5.77)    | 5.15<br>(4.69, 5.62)    | 5.20<br>(4.75, 5.66)    | 5.05<br>(4.60, 5.51)    | 5.58<br>(5.13, 6.03)    | 0.678                | 0.038<br>(-0.047, 0.124)  | 0.38<br>0 | 0.012<br>(-0.005, 0.028)           | 0.17<br>6               |

Statistically significant associations (p<0.05) shown in **bold**; <sup>†</sup>Model estimated mean and 95% confidence interval, adjusted for replicate, experimental box, and baseline values of phenotype; <sup>‡</sup>p-value from ANOVA testing whether there are any differences in phenotype among dosage groups; <sup>§</sup>Results from linear model treating dose as an ordinal variable –  $\beta$  represents the expected change in phenotype associated with increasing to the next highest dosage group; <sup>¶</sup>Results from continuous dosage model –  $\beta$  represents the expected change in phenotype for 1  $\mu$ M increase in dose; \*p<0.05 compared to DMSO in pairwise comparisons (performed only when ANOVA p<0.05).

**Table S3.** Sleep during the lights off period after Ivabradine administration for Melatonin as a positive control\*

| Phenotype                                                                                                                                                                                                                                                                                                                                                                                                                                               | Adjusted Mean (95% CI) <sup>†</sup> |                      | Difference (95% CI) <sup>‡</sup> | p <sup>§</sup> |
|---------------------------------------------------------------------------------------------------------------------------------------------------------------------------------------------------------------------------------------------------------------------------------------------------------------------------------------------------------------------------------------------------------------------------------------------------------|-------------------------------------|----------------------|----------------------------------|----------------|
|                                                                                                                                                                                                                                                                                                                                                                                                                                                         | DMSO                                | Melatonin            |                                  |                |
| <b>Total Sleep, minutes</b>                                                                                                                                                                                                                                                                                                                                                                                                                             | 379.7 (362.9, 396.5)                | 394.7 (377.7, 411.6) | 15.0 (-8.9, 38.8)                | 0.218          |
| <b>Sleep Bouts, number</b>                                                                                                                                                                                                                                                                                                                                                                                                                              | 81.0 (77.2, 84.8)                   | 72.5 (68.7, 76.3)    | <b>-8.5 (-13.9, -3.1)</b>        | <b>0.002</b>   |
| <b>Sleep Latency, minutes</b>                                                                                                                                                                                                                                                                                                                                                                                                                           | 6.75 (5.95, 7.54)                   | 6.50 (5.69, 7.30)    | -0.25 (-1.38, 0.89)              | 0.667          |
| <b>Bout Length, minutes</b>                                                                                                                                                                                                                                                                                                                                                                                                                             | 5.01 (4.53, 5.49)                   | 5.96 (5.47, 6.44)    | <b>0.95 (0.27, 1.63)</b>         | <b>0.007</b>   |
| Statistically significant differences (p<0.05) shown in <b>bold</b> ; <sup>†</sup> Model estimated mean and 95% confidence interval, adjusted for replicate, experimental box, and baseline values of phenotype; <sup>‡</sup> Adjusted mean difference and 95% CI between melatonin and DMSO groups; <sup>§</sup> p-value comparing phenotype between DMSO and Melatonin groups. * These data are from experiments that involved studies of Ivabradine. |                                     |                      |                                  |                |

**Table S4.** Sleep and Activity Immediately after Zatebradine Hydrochloride Administration

for Melatonin As a Positive Control\*

| Phenotype                                                                                                                                                                                                                                                                                                                                                                                                                                         | Adjusted Mean (95% CI) <sup>†</sup> |                     | Difference (95% CI) <sup>‡</sup> | p <sup>§</sup>    |
|---------------------------------------------------------------------------------------------------------------------------------------------------------------------------------------------------------------------------------------------------------------------------------------------------------------------------------------------------------------------------------------------------------------------------------------------------|-------------------------------------|---------------------|----------------------------------|-------------------|
|                                                                                                                                                                                                                                                                                                                                                                                                                                                   | DMSO                                | Melatonin           |                                  |                   |
| <b>Total Sleep, minutes</b>                                                                                                                                                                                                                                                                                                                                                                                                                       | 20.9 (1.4, 40.3)                    | 108.9 (89.4, 128.3) | <b>88.0 (60.3, 115.6)</b>        | <b>&lt;0.0001</b> |
| <b>Sleep Bouts, number</b>                                                                                                                                                                                                                                                                                                                                                                                                                        | 11.5 (4.8, 18.2)                    | 42.5 (35.8, 49.2)   | <b>31.0 (21.55, 40.52)</b>       | <b>&lt;0.0001</b> |
| <b>Sleep Latency, minutes</b>                                                                                                                                                                                                                                                                                                                                                                                                                     | 144.1 (110.8, 177.3)                | 31.7 (-1.5, 65.0)   | <b>-112.4 (-159.5, -65.3)</b>    | <b>&lt;0.0001</b> |
| <b>Bout Length, minutes</b>                                                                                                                                                                                                                                                                                                                                                                                                                       | 1.82 (1.49, 2.15)                   | 2.31 (2.01, 2.61)   | <b>0.49 (0.05, 0.94)</b>         | <b>0.031</b>      |
| <b>Avg. Activity, sec/min</b>                                                                                                                                                                                                                                                                                                                                                                                                                     | 3.12 (2.85, 3.38)                   | 1.15 (0.89, 1.41)   | <b>-1.97 (-2.34, -1.59)</b>      | <b>&lt;0.0001</b> |
| <b>Avg. Wake Act., sec/min</b>                                                                                                                                                                                                                                                                                                                                                                                                                    | 3.17 (2.91, 3.43)                   | 1.22 (0.96, 1.48)   | <b>-1.95 (-2.32, -1.58)</b>      | <b>&lt;0.0001</b> |
| Statistically significant differences (p<0.05) shown in <b>bold</b> ; <sup>†</sup> Model estimated mean and 95% confidence interval, adjusted for replicate and baseline values of phenotype; <sup>‡</sup> Adjusted mean difference and 95% CI between melatonin and DMSO groups; <sup>§</sup> p-value comparing phenotype between DMSO and Melatonin groups.*These data are from experiments that involved studies of Zatebradine Hydrochloride. |                                     |                     |                                  |                   |

**Table S5.** Sleep during the lights off period after Drug Administration of different doses of Zatebradine Hydrochloride and with DMSO as a control

| Phenotype                     | Adjusted Mean (95% CI) <sup>†</sup> |                         |                         |                         |                         |                         |                         | ANOVA<br>p <sup>‡</sup> | Linear Model <sup>§</sup> |           | Dosage Model <sup>¶</sup>          |                         |
|-------------------------------|-------------------------------------|-------------------------|-------------------------|-------------------------|-------------------------|-------------------------|-------------------------|-------------------------|---------------------------|-----------|------------------------------------|-------------------------|
|                               | DMSO                                | 0.1 μM                  | 0.3 μM                  | 1.0 μM                  | 4.5 μM                  | 10 μM                   | 30 μM                   |                         | β (95% CI)                | p         | β (95% CI)                         | p                       |
| <b>Total Sleep, minutes</b>   | 386.2<br>(359.3, 413.2)             | 393.7<br>(366.4, 421.0) | 369.4<br>(342.5, 396.4) | 337.1<br>(310.5, 363.7) | 384.6<br>(357.9, 411.2) | 377.5<br>(350.6, 404.4) | 388.6<br>(361.7, 415.5) | 0.068                   | -0.25<br>(-5.45, 4.95)    | 0.92<br>5 | 0.52<br>(-0.50, 1.53)              | 0.31<br>9               |
| <b>Sleep Bouts, number</b>    | 78.2<br>(73.0, 83.3)                | 79.0<br>(73.8, 84.1)    | 76.0<br>(70.9, 81.1)    | 76.7<br>(71.7, 81.8)    | 77.1<br>(72.1, 82.2)    | 82.8<br>(77.7, 87.9)    | 83.3<br>(78.2, 88.5)    | 0.264                   | 0.87<br>(-0.10, 1.83)     | 0.07<br>9 | <b>0.22</b><br><b>(0.03, 0.41)</b> | <b>0.02</b><br><b>5</b> |
| <b>Sleep Latency, minutes</b> | 7.45<br>(5.94, 8.97)                | 8.29<br>(6.78, 9.81)    | 7.87<br>(6.36, 9.38)    | 8.93<br>(7.43, 10.44)   | 7.72<br>(6.23, 9.22)    | 7.11<br>(5.59, 8.62)    | 7.02<br>(5.51, 8.53)    | 0.582                   | -0.139<br>(-0.424, 0.146) | 0.33<br>8 | -0.039<br>(-0.095, 0.016)          | 0.16<br>6               |
| <b>Bout Length, minutes</b>   | 5.28<br>(4.63, 5.93)                | 5.35<br>(4.69, 6.01)    | 5.11<br>(4.47, 5.76)    | 4.90<br>(4.26, 5.54)    | 5.27<br>(4.63, 5.91)    | 4.74<br>(4.09, 5.39)    | 5.08<br>(4.43, 5.72)    | 0.841                   | -0.059<br>(-0.181, 0.063) | 0.34<br>1 | -0.005<br>(-0.029, 0.019)          | 0.66<br>7               |

Statistically significant associations (p<0.05) shown in **bold**; <sup>†</sup>Model estimated mean and 95% confidence interval, adjusted for replicate and baseline values of phenotype; <sup>‡</sup>p-value from ANOVA testing whether there are any differences in phenotype among dosage groups; <sup>§</sup>Results from linear model treating dose as an ordinal variable – β represents the expected change in phenotype associated with increasing to the next highest dosage group; <sup>¶</sup>Results from continuous dosage model – β represents the expected change in phenotype for 1 μM increase in dose; \*p<0.05 compared to DMSO in pairwise comparisons (performed only when ANOVA p<0.05).

**Table S6.** Sleep during the lights off period after Zatebradine Hydrochloride

Administration for Melatonin As a Positive Control\*

| Phenotype                     | Adjusted Mean (95% CI) <sup>†</sup> |                      | Difference (95% CI) <sup>‡</sup> | p <sup>§</sup> |
|-------------------------------|-------------------------------------|----------------------|----------------------------------|----------------|
|                               | DMSO                                | Melatonin            |                                  |                |
| <b>Total Sleep, minutes</b>   | 382.6 (353.7, 411.5)                | 358.0 (329.2, 386.9) | -24.6 (-65.6, 16.5)              | 0.237          |
| <b>Sleep Bouts, number</b>    | 79.2 (73.8, 84.7)                   | 78.7 (73.2, 84.1)    | -0.5 (-8.3, 7.2)                 | 0.892          |
| <b>Sleep Latency, minutes</b> | 7.34 (5.44, 9.24)                   | 8.55 (6.65, 10.45)   | 1.21 (-1.48, 3.90)               | 0.372          |
| <b>Bout Length, minutes</b>   | 5.19 (4.65, 5.73)                   | 4.59 (4.05, 5.13)    | -0.60 (-1.37, 0.17)              | 0.123          |

<sup>†</sup>Model estimated mean and 95% confidence interval, adjusted for replicate and baseline values of phenotype; <sup>‡</sup>Adjusted mean difference and 95% CI between melatonin and DMSO groups; <sup>§</sup>p-value comparing phenotype between DMSO and Melatonin groups.\* These data are from experiments that involved studies of Zatebradine Hydrochloride.



**Table S7.** Sleep and Activity Immediately after ZD7288 Administration for Melatonin As a Positive Control\*

| Phenotype                                                                                                                                                                                                                                                                                                                                                                                                                       | Adjusted Mean (95% CI) <sup>†</sup> |                     | Difference (95% CI) <sup>‡</sup> | p <sup>§</sup>    |
|---------------------------------------------------------------------------------------------------------------------------------------------------------------------------------------------------------------------------------------------------------------------------------------------------------------------------------------------------------------------------------------------------------------------------------|-------------------------------------|---------------------|----------------------------------|-------------------|
|                                                                                                                                                                                                                                                                                                                                                                                                                                 | DMSO                                | Melatonin           |                                  |                   |
| <b>Total Sleep, minutes</b>                                                                                                                                                                                                                                                                                                                                                                                                     | 22.5 (4.6, 40.4)                    | 110.3 (92.4, 128.2) | <b>87.8 (62.2, 113.3)</b>        | <b>&lt;0.0001</b> |
| <b>Sleep Bouts, number</b>                                                                                                                                                                                                                                                                                                                                                                                                      | 10.6 (5.7, 15.5)                    | 44.3 (39.4, 49.2)   | <b>33.7 (26.7, 40.7)</b>         | <b>&lt;0.0001</b> |
| <b>Sleep Latency, minutes</b>                                                                                                                                                                                                                                                                                                                                                                                                   | 94.7 (69.9, 119.5)                  | 12.4 (-12.4, 37.2)  | <b>-82.3 (-117.7, -46.9)</b>     | <b>&lt;0.0001</b> |
| <b>Bout Length, minutes</b>                                                                                                                                                                                                                                                                                                                                                                                                     | 1.60 (1.24, 1.95)                   | 2.39 (2.07, 2.71)   | <b>0.80 (0.32, 1.28)</b>         | <b>0.002</b>      |
| <b>Avg. Activity, sec/min</b>                                                                                                                                                                                                                                                                                                                                                                                                   | 3.82 (3.50, 4.14)                   | 1.26 (0.94, 1.57)   | <b>-2.56 (-3.03, -2.10)</b>      | <b>&lt;0.0001</b> |
| <b>Avg. Wake Act., sec/min</b>                                                                                                                                                                                                                                                                                                                                                                                                  | 3.90 (3.59, 4.20)                   | 1.37 (1.07, 1.68)   | <b>-2.52 (-2.97, -2.08)</b>      | <b>&lt;0.0001</b> |
| Statistically significant differences (p<0.05) shown in <b>bold</b> ; <sup>†</sup> Model estimated mean and 95% confidence interval, adjusted for replicate and baseline values of phenotype; <sup>‡</sup> Adjusted mean difference and 95% CI between melatonin and DMSO groups; <sup>§</sup> p-value comparing phenotype between DMSO and Melatonin groups. *These data are from experiments that involved studies of ZD7288. |                                     |                     |                                  |                   |

**Table S8.** Sleep during the lights off period after Drug Administration with different doses of ZD7288

| Phenotype                     | Adjusted Mean (95% CI) <sup>†</sup> |                         |                         |                         |                                        |                                     |                         | ANO<br>VA p <sup>‡</sup> | Linear Model <sup>§</sup>             |              | Dosage Model <sup>¶</sup> |       |
|-------------------------------|-------------------------------------|-------------------------|-------------------------|-------------------------|----------------------------------------|-------------------------------------|-------------------------|--------------------------|---------------------------------------|--------------|---------------------------|-------|
|                               | DMSO                                | 0.1 μM                  | 0.3 μM                  | 1.0 μM                  | 4.5 μM                                 | 10 μM                               | 30 μM                   |                          | β (95% CI)                            | p            | β (95% CI)                | p     |
| <b>Total Sleep, minutes</b>   | 356.8<br>(328.6, 385.0)             | 340.1<br>(311.7, 368.5) | 371.1<br>(343.3, 398.8) | 374.8<br>(346.6, 402.9) | <b>412.1</b><br><b>(383.4, 440.8)*</b> | 365.7<br>(337.6, 393.9)             | 383.1<br>(354.8, 411.5) | <b>0.036</b>             | <b>5.75</b><br><b>(0.23, 11.27)</b>   | <b>0.041</b> | 0.56<br>(-0.52, 1.63)     | 0.310 |
| <b>Sleep Bouts, number</b>    | 78.0<br>(72.7, 83.2)                | 81.1<br>(75.8, 86.4)    | 72.4<br>(67.1, 77.6)    | 73.1<br>(67.8, 78.4)    | <b>64.6</b><br><b>(59.2, 69.9)*</b>    | <b>69.1</b><br><b>(63.8, 74.4)*</b> | 77.0<br>(71.6, 82.3)    | <b>0.0003</b>            | <b>-1.24</b><br><b>(-2.27, -0.21)</b> | <b>0.019</b> | 0.02<br>(-0.19, 0.22)     | 0.867 |
| <b>Sleep Latency, minutes</b> | 7.12<br>(5.99, 8.25)                | 8.11<br>(6.96, 9.26)    | 5.63<br>(4.50, 6.76)    | 7.12<br>(5.97, 8.27)    | 6.05<br>(4.90, 7.20)                   | 6.44<br>(5.29, 7.59)                | 6.38<br>(5.22, 7.53)    | 0.064                    | -0.181<br>(-0.400, 0.038)             | 0.104        | -0.020<br>(-0.063, 0.024) | 0.378 |
| <b>Bout Length, minutes</b>   | 5.18<br>(4.42, 5.95)                | 4.57<br>(3.80, 5.34)    | 5.49<br>(4.73, 6.25)    | 5.38<br>(4.61, 6.15)    | <b>6.87</b><br><b>(6.10, 7.64)*</b>    | 6.13<br>(5.36, 6.90)                | 5.53<br>(4.76, 6.29)    | <b>0.003</b>             | <b>0.195</b><br><b>(0.047, 0.343)</b> | <b>0.010</b> | 0.012<br>(-0.017, 0.042)  | 0.418 |

<sup>†</sup>Model estimated mean and 95% confidence interval, adjusted for replicate and baseline values of phenotype; <sup>‡</sup>p-value from ANOVA testing whether there are any differences in phenotype among dosage groups; <sup>§</sup>Results from linear model treating dose as an ordinal variable – β represents the expected change in phenotype associated with increasing to the next highest dosage group; <sup>¶</sup>Results from continuous dosage model – β represents the expected change in phenotype for 1 μM increase in dose; \*p<0.05 compared to DMSO in pairwise comparisons (performed only when ANOVA p<0.05).

**Table S9.** Sleep during the lights off period after ZD7288 Administration for Melatonin  
As a Positive Control\*

| Phenotype                     | Adjusted Mean (95% CI) <sup>†</sup> |                      | Difference (95% CI) <sup>‡</sup> | p <sup>§</sup> |
|-------------------------------|-------------------------------------|----------------------|----------------------------------|----------------|
|                               | DMSO                                | Melatonin            |                                  |                |
| <b>Total Sleep, minutes</b>   | 348.3 (318.0, 378.5)                | 337.5 (307.2, 367.7) | -10.8 (-54.3, 32.7)              | 0.621          |
| <b>Sleep Bouts, number</b>    | 80.5 (74.6, 86.4)                   | 78.2 (72.2, 84.1)    | -2.3 (-10.7, 6.1)                | 0.582          |
| <b>Sleep Latency, minutes</b> | 7.05 (5.74, 8.36)                   | 7.38 (6.07, 8.69)    | 0.33 (-1.53, 2.19)               | 0.728          |
| <b>Bout Length, minutes</b>   | 4.56 (3.90, 5.22)                   | 4.59 (3.93, 5.26)    | 0.04 (-0.90, 0.97)               | 0.939          |

<sup>†</sup>Model estimated mean and 95% confidence interval, adjusted for replicate and baseline values of phenotype; <sup>‡</sup>Adjusted mean difference and 95% CI between melatonin and DMSO groups; <sup>§</sup>p-value comparing phenotype between DMSO and Melatonin groups.\* These data are from experiments that involved studies of ZD7288.
